# Supplementary material
Source: PubMed Central journal article supplement (PMC2840288)
Supplement: 0911609106_pnas.200911609SI.pdf [file 0911609106_pnas.200911609SI.pdf]

# Supporting Information

Hemrajani et al. 10.1073/pnas.0911609106

## SI Materials and Methods

**Bacterial Strains and Growth Conditions.** The strains and primers used in this study are listed in Tables S1 and S2. The lambda red system (1) was used to delete *nleH1* and *nleH2* from WT EPEC strain E2348/69 (2), generating strain ICC303. *nleH1*-specific primer pair 1–2 was used to amplify the kanamycin cassette from pSB315 (3). *nleH2*-specific primer pair 3–4 was used to amplify the chloramphenicol cassette from pKD3 (1). Deletion of *nleH1* and *nleH2* was confirmed using primer pairs 19–20 (*nleH* external), 21–22 (kanamycin cassette-specific), 23–24 (*nleH2* external), and 25–26 (chloramphenicol cassette-specific). The *C. rodentium* ICC180  $\Delta nleH$  mutant (ICC285) was prepared as described previously (4).

Bacteria were cultured in LB broth at 37 °C for 18 h with appropriate antibiotics (100  $\mu\text{g mL}^{-1}$  of ampicillin, 25  $\mu\text{g mL}^{-1}$  of chloramphenicol, or 50  $\mu\text{g mL}^{-1}$  of kanamycin). Overnight LB cultures were primed for infection by 1:100 dilution in DMEM containing 1,000 mg/L of glucose without phenol red, followed by a further incubation for 3 h at 37 °C without agitation; 1 mM isopropyl- $\beta$ -D-thiogalactopyranoside was added during the final 30 min when needed (for expression from pSA10-derived plasmids). HeLa cells were infected with primed bacteria normalized to a multiplicity of infection (MOI) of 1:50 or 1:100 for the specified time points.

**Plasmids and *nleH* Gene Cloning.** The plasmids used in this study are listed in Table S3. For purification of His-tagged NleH, *nleH1* was amplified using primers 29 and 30, and then cloned into pET28a (generating pICC451). pICC451 and pICC449 were used as a template for site-directed mutagenesis (K159A) using the QuikChange Site-Directed Mutagenesis Kit (Stratagene) and the primer pair 31–32 (generating pICC452 and pICC450, respectively). For cloning into the bacterial expression vector pSA10 (5), *neH1* and *nleH2* were amplified using primer pairs 5–6 and 7–8, respectively (generating pICC443 and pICC444, respectively). For Y2H screening, *neH1*, *nleH2*, and *ospG* were cloned into pGBT9 (Clontech) to generate pICC447, pICC448, and pICC456, respectively, using primer pairs 9–10, 11–12, and 35–36, respectively. Deletion of the 100 first amino acids of NleH was done by inverse PCR on pGBT9(*nleH1*) using the primer pair 33–34, generating pGBT9(*nleH1* $_{\Delta 100}$ ) (pICC455). For transfection experiments, *nleH1* and *nleH1* $_{K159A}$  were cloned into the transfection vector pHM6 (Roche) using primers 13–14 and E2348/69 DNA or pICC452 as templates, respectively, generating pHM6(*nleH1*) (pICC449) and pHM6(*nleH1* $_{K159A}$ ) (pICC450). The pEGFP-N1 (Clontech) vector was used as a control in all transfection experiments. For transfection experiments, *bi-1* was cloned into the transfection vector pRK5-Myc using primers 37–38 and pICC458 as a template.

**Protein Purification.** NleH1-His and NleH1(K159A)-His were purified using a Ni<sup>2+</sup> agarose His-Bind Resin Column (Novagen). Purified NleH1-His and NleH1(K159A)-His were dialyzed against EB50 buffer [50 mM Tris (pH 8), 2 mM DTT, 2 mM EDTA, 10% glycerol, and 50 mM NaCl]. Dialyzed proteins were then concentrated using 10 kDa of Amicon Centricons (Millipore) and frozen in 50- $\mu\text{L}$  aliquots at  $-80$  °C. NaCl concentration was adjusted, and 0.1% Triton X-100 was added equally to all samples, to prevent precipitation during storage.

**Kinase Assay.** NleH1-His and NleH1(K159A)-His were added to the kinase assay reagent mix [50 mM Tris-HCl (pH 7.5), 10 mM

MgCl<sub>2</sub>, 100 mM NaCl, 1 mM DTT, and 50  $\mu\text{M}$  ATP] with 5  $\mu\text{Ci}$  of [ $\gamma$ -<sup>33</sup>P]ATP (370 MBq/mL, 3,000 Ci/mmol; MP Radiochemicals) with or without 10  $\mu\text{g}$  of the general substrate MBP (Sigma-Aldrich). The positive control was 100 units of Abl tyrosine kinase (New England Biolabs). The mixture was incubated for 30 min at 37 °C and subjected to SDS/PAGE, followed by Coomassie blue staining and autoradiography.

**Tissue Culture, Transfection, and Pharmacology.** HeLa cells were grown and infected as described previously (6). Cells were transfected with the different expression vectors using Lipofectamine 2000 (Invitrogen) or with 20  $\mu\text{M}$  BI-1 or control siRNA using Hyperfect (Qiagen) according to the manufacturers' recommendations. After 72 h, knockdown of BI-1 expression was tested by RNA isolation using the Qiagen RNeasy Kit according to the manufacturer's instructions, and by semiquantitative RT-PCR using BI-1 (h)-PR (sc-37298-PR; Santa Cruz Biotechnology) or GAPDH (primers 15 and 16) primers.

Apoptosis was induced by the addition of 1  $\mu\text{M}$  of STS (Calbiochem) for 4 h during EPEC infection and for 6 h during transfection. ER stress was induced by the addition of 10  $\mu\text{g/mL}$  of BFA (Sigma-Aldrich) or 5  $\mu\text{g/mL}$  of TUN (Sigma-Aldrich), followed by an 18-h incubation. The global caspases inhibitor z-VAD-fmk (Calbiochem) was used at a final concentration of 66  $\mu\text{M}$  (added together with bacteria or with STS).

**Epifluorescence Microscopy and Scanning Electron Microscopy.** For analysis of nuclear condensation, cleaved caspase-3 staining, and membrane blebbing, HeLa cells were infected with a MOI of 1:50 for 1 h as described previously (6). Following five washes with HBSS, 250  $\mu\text{g/mL}$  of gentamicin (Invitrogen) was added to kill the bacteria (to avoid cytotoxic effects of bacterial multiplication) for a further 2 h before processing for DNA staining with Hoescht 33342 (Molecular Probes), cleaved caspase-3 staining, or SEM.

Membrane blebbing was analyzed by phase contrast and was distinguished from attached bacteria stained with Hoescht 33342. Membrane blebbing was confirmed by SEM. For SEM, cells were fixed with formaldehyde, washed in phosphate buffer (0.1 M, pH 7.3), fixed overnight in 3% glutaraldehyde and postfixed in 1% osmium tetroxide for 30 min. Samples were processed using standard dehydration and critical point drying methods, sputter coated using a gold sputter (gold-palladium target). Samples were examined using a JEOL JSM-6390 scanning electron microscope.

For cleaved caspase-3 staining, transfected cells were fixed in prechilled methanol for 10 min at  $-20$  °C, permeabilized, washed and quenched for 30 min with 50 mM NH<sub>4</sub>Cl, and stained as described previously (6). Cleaved caspase-3 (active) was detected with rabbit anti-cleaved caspase-3 (Cell Signaling Technology), incubated overnight at 4 °C, and HA-NleH1 was stained with mouse anti-HA (Covance), diluted at 1:1,000 and 1:500, respectively, in 5% BSA. Donkey anti-rabbit IgG conjugated to rhodamine (RRX) and donkey anti-mouse IgG conjugated to Cy2 (Jackson Laboratories) were used at concentrations recommended by the manufacturer. For myc-BI-1/HA-NleH1 colocalization, transfected cells were fixed with paraformaldehyde, permeabilized with Triton X-100, washed with PBS, and quenched for 30 min with 50 mM NH<sub>4</sub>Cl. HA-NleH1 was detected with mouse anti-HA (Covance) diluted at 1:500 and then with donkey anti-mouse IgG conjugated to RRX. Myc-BI-1 was next detected with mouse anti-myc conjugated to FITC (Sigma-Aldrich) diluted at 1:240 in 5% BSA.

Before epifluorescence observation, the coverslips were mounted on slides using ProLong Gold antifade reagent (Invitrogen) and visualized with a Zeiss Axioimager immunofluorescence microscope. All images were analyzed using Zeiss Axiovision Rel 4.5 software.

**Cell Viability Assay.** HeLa cells grown in 24-well plates were infected for 1 h with an MOI of 1:100 and then treated with 250  $\mu\text{g}/\text{mL}$  gentamicin for 4 h. Cells were washed three times with PBS and then trypsinized; trypsin was inactivated with culture media. Then 0.05% Trypan blue in PBS was mixed with HeLa cells at a 1:1 ratio just before counting on a Neubauer hemocytometer (Sigma-Aldrich). All counts were compared with the level of uninfected untreated cells and plotted as a percentage of adherent cells.

**Detection of Procaspace-3 by Western Blot Analysis.** HeLa cells, grown in six-well plates, were infected for 1 h with an MOI of 1:100. After five washes in HBSS, 250  $\mu\text{g}/\text{mL}$  of gentamicin and STS were added, and the cells were incubated at 37 °C for 3 h. After washing, the cells were lysed in 1% Triton X-100 containing a protease inhibitor mixture (Sigma-Aldrich). Cells were scraped on ice, and the lysates were sonicated. Whole-cell lysates were concentrated using Biomax protein-concentrating columns (Millipore), run on 12% SDS/PAGE gels, and transferred to PVDF membrane. Membranes were stained overnight at 4 °C with anti-procaspace-3 (Cell Signaling Technology), followed by incubation with anti-rabbit IgG-HRP conjugate (Dako), diluted 1:3,000, for 45 min at room temperature. Membranes were incubated with ECL reagents (GE Healthcare), and luminescence was detected using a Fuji LAS 3000 imager. The same membrane was then washed and incubated with the primary mouse anti-tubulin antibody (Developmental Studies Hybridoma Bank) and secondary anti-mouse IgG-HRP conjugate (Dako).

**Measurement of Cytosolic  $\text{Ca}^{2+}$  Levels.** Cytosolic  $\text{Ca}^{2+}$  levels were measured using the commercially available fluorescent indicator Fluo-4 Direct (Invitrogen) according to the manufacturer's instructions. HeLa cells were grown in 96-well microplates, incubated with Fluo-4 Direct for 1 h at 37 °C, and then infected for 3.5 h using primed bacteria (MOI 1:100). Fluorescent intensities were determined using a fluorometer set for excitation at 494 nm and emission at 516 nm.

**Yeast Two-Hybrid System.** A pretransformed Matchmaker HeLa cell cDNA library (Clontech) was screened against the NleH1 bait according to the manufacturer's protocol. Plasmid from positive colonies was purified using the yeast plasmid purification protocol described in Clontech's Yeast Protocols Handbook (PT3024-1); transformed into HB101; selected on M9 minimal media supplemented with proline, thiamine, streptomycin (100  $\mu\text{g}/\text{mL}$ ), and

ampicillin (100  $\mu\text{g}/\text{mL}$ ); and sequenced. Protein interactions were confirmed by cotransforming the yeast AH109 with pGBT9 (*nleH1*), pGBT9(*nleH1* $_{\Delta 100}$ ), pGBT9(*nleH2*) or pGBT9(*ospG*), and pGAD(*bi-1*) or pGAD(*bi-1* $_{1-40}$ ), and plating on selective media (-Ade, His, Trp, Leu).

**Murine Models.** All animal experiments were performed in accordance with the Animals Act 1986 and were approved by the local Ethical Review Committee. Specific-pathogen-free female WT inbred C57BL/6 6- to 8-week-old mice were used in the study. All animals were housed in individually HEPA-filtered cages with sterile bedding. Independent experiments were performed using at least four mice per group.

**Oral Inoculation and Harvesting.** Mice were orally inoculated using a gavage needle with 200  $\mu\text{L}$  of an overnight LB-grown bacterial suspension of *C. rodentium* in PBS ( $\sim 5 \times 10^9$  CFU). The number of viable bacteria used as the inoculum was determined by retrospective plating onto LB agar-containing antibiotics. Stool samples were recovered aseptically at various time points after inoculation, and the number of viable bacteria per gram of stool was determined after homogenization at 0.1  $\text{g mL}^{-1}$  in PBS and plating onto LB agar containing the appropriate antibiotics.

**Tissue Collection and IFA Staining.** Segments of the cecum and the terminal colon of each mouse were collected at 9 days post-inoculation, rinsed of their contents, and fixed in 10% buffered formalin for microscopic examination. Formalin-fixed tissues were then processed, embedded in paraffin, and sectioned at 5  $\mu\text{m}$ . Sections were unwaxed in HistoClear with two 10-min washes and then rehydrated in 100%, 95%, and 80% ethanol before immersion in PBS 0.1% Tween 20 0.1% saponin (PBS-TS). Sections were then placed in 10 mM sodium citrate and heated to 100 °C for 10 min for heat-induced antigen unmasking. Blocking was conducted in PBS-TS with 10% normal donkey serum before labeling. Caspase-3 cleavage was analyzed by indirect immunofluorescence assay (IFA) using chicken anti-timin antibody to label bacteria and rabbit anti-cleaved caspase-3 (Cell Signaling) overnight at 4 °C and Hoechst at room temperature for 1 h in a humidified chamber for DNA labeling. Multiple separate sections of each mouse were examined, and at least four sites of adherent bacteria were analyzed per mouse.

Sections were examined with a Zeiss Axio Imager M1 microscope. Images were acquired using a Zeiss AxioCam MRm monochrome camera and computer-processed using Zeiss AxioVision, Adobe Photoshop 5.0, and Adobe Illustrator 8.0 software.

**Statistics.** All statistical tests were performed using commercially available GraphPad InStat version 3.06 software on experiments tested in triplicate and repeated a minimum of three times.

1. Datsenko KA, Wanner BL (2000) One-step inactivation of chromosomal genes in *Escherichia coli* K-12 using PCR products. *Proc Natl Acad Sci USA* 97:6640–6645.
2. Levine MM, et al. (1978) *Escherichia coli* strains that cause diarrhoea but do not produce heat-labile or heat-stable enterotoxins and are noninvasive. *Lancet* 1:1119–1122.
3. Dahan S, et al. (2005) EspJ is a prophage-carried type III effector protein of attaching and effacing pathogens that modulates infection dynamics. *Infect Immun* 73:679–686.
4. Hemrajani C, et al. (2008) Role of NleH, a type III secreted effector from attaching and effacing pathogens, in colonization of the bovine, ovine, and murine gut. *Infect Immun* 76:4804–4813.
5. Schlosser-Silverman E, Elgrably-Weiss M, Rosenshine I, Kohen R, Altuvia S (2000) Characterization of *Escherichia coli* DNA lesions generated within J774 macrophages. *J Bacteriol* 182:5225–5230.
6. Whale AD, et al. (2007) TccP2-mediated subversion of actin dynamics by EPEC 2: A distinct evolutionary lineage of enteropathogenic *Escherichia coli*. *Microbiology* 153:1743–1755.

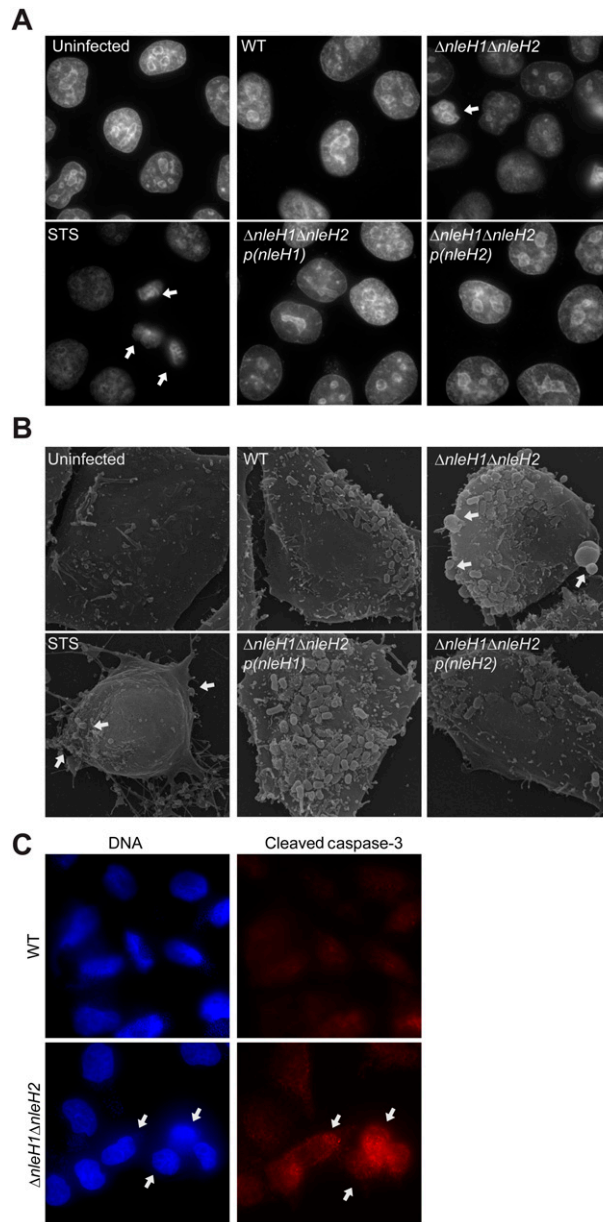

**Fig. S1.** HeLa cells infected with EPEC  $\Delta nleH$  undergo apoptosis. Cells infected for 3 h with WT EPEC,  $\Delta nleH1\Delta nleH2$ , and complemented strains p(*nleH1*) or p(*nleH2*) were stained with Hoechst for evaluation of nuclear condensation and fragmentation (A, arrows), processed for SEM to visualize membrane blebbing (B, arrows), or stained with cleaved caspase-3 antibody (C, arrows). Uninfected and STS-treated cells were used as controls.







**Table S1. Strains used in this study**

| Strains  | Characteristics                                                                                                                                                                               | Reference  |
|----------|-----------------------------------------------------------------------------------------------------------------------------------------------------------------------------------------------|------------|
| E2348/69 | Wild-type EPEC O127:H6                                                                                                                                                                        | (1)        |
| ICC303   | EPEC E2348/69 $\Delta nleH1\Delta nleH2$ , $nleH1::Kan$ , $nleH2::Cm$ ( $Kan^r$ $Cm^r$ )                                                                                                      | This study |
| AH109    | <i>S. cerevisiae</i> <i>MATa</i> mating type with <i>HIS3</i> , <i>ADE2</i> , <i>lacZ</i> , and <i>MEL1</i> reporters for interaction, and <i>TRP1</i> and <i>LEU2</i> transformation markers | Clontech   |
| Y187     | <i>S. cerevisiae</i> <i>MAT<math>\alpha</math></i> mating type with <i>lacZ</i> , and <i>MEL1</i> reporters for interaction, and <i>TRP1</i> and <i>LEU2</i> transformation markers           | Clontech   |
| ICC180   | Bioluminescent <i>C. rodentium</i> harboring the <i>Photorhabdus luxCDABE</i> operon ( $Kan^r$ )                                                                                              | (2)        |
| ICC285   | ICC180 $\Delta nleH$ ( $Kan^r$ $Cm^r$ )                                                                                                                                                       | (3)        |

$Kan^r$ , kanamycin;  $Cm^r$ , chloramphenicol.

- Levine MM, et al. (1978) *Escherichia coli* strains that cause diarrhoea but do not produce heat-labile or heat-stable enterotoxins and are noninvasive. *Lancet* 1:1119–1122.
- Wiles S, et al. (2004) Organ specificity, colonization and clearance dynamics in vivo following oral challenges with the murine pathogen *Citrobacter rodentium*. *Cell Microbiol* 6: 963–972.
- Hemrajani C et al. (2008) Role of NleH, a type III secreted effector from attaching and effacing pathogens, in colonization of the bovine, ovine, and murine gut. *Infect Immun* 76: 4804–4813.

**Table S2. Plasmids used in this study**

| Plasmids      | Characteristics                                                                                                                     | Reference  |
|---------------|-------------------------------------------------------------------------------------------------------------------------------------|------------|
| pSA10         | pKK177-3 expression vector containing <i>lacI</i> gene                                                                              | (1)        |
| pICC443       | p( <i>nleH1</i> ), Derivative of pSA10, expressing NleH1                                                                            | This study |
| pICC444       | p( <i>nleH2</i> ), Derivative of pSA10, expressing NleH2                                                                            | This study |
| pGBT9         | Y2H expression vector with GAL4 DNA binding domain (GAL4-BD)                                                                        | Clontech   |
| pGAD-T7 Rec   | Y2H vector containing library inserts fused to GAL4 DNA activation domain (GAL4-AD)                                                 | Clontech   |
| pGAD424       | Y2H expression vector with GAL4 DNA activation domain (GAL4-AD)                                                                     | Clontech   |
| pICC447       | pGBT9( <i>nleH1</i> ), Derivative of pGBT9, expressing NleH1 fused to GAL4-BD                                                       | This study |
| pICC448       | pGBT9( <i>nleH2</i> ), Derivative of pGBT9, expressing NleH2 fused to GAL4-BD                                                       | This study |
| pICC455       | pGBT9( <i>nleH1</i> $_{\Delta 100}$ ), Derivative of pGBT9 expressing NleH1 deleted from its first 100 amino acids fused to GAL4-BD | This study |
| pICC456       | pGBT9 ( <i>OspG</i> ), Derivative of pGBT9 expressing <i>OspG</i> fused to GAL4-BD                                                  | This study |
| pICC457       | pGAD( <i>bi-1</i> ), Derivative of pGAD424 expressing BI-1 fused to GAL4-AD                                                         | Clontech   |
| pHM6          | Mammalian expression vector with N-term HA tag                                                                                      | Roche      |
| pICC449       | pHM6( <i>nleH1</i> ), Derivative of pHM6, expressing HA-NleH1                                                                       | This study |
| pICC450       | pHM6( <i>nleH1</i> $_{K159A}$ ), Derivative of pHM6, expressing HA-NleH1 $_{K159A}$                                                 | This study |
| pET28a        | Vector for expression of His-tagged proteins                                                                                        | Novagen    |
| pICC451       | pET28a expressing NleH1 His tagged                                                                                                  | This study |
| pICC452       | pET28a expressing NleH1 $_{K159A}$ His tagged                                                                                       | This study |
| pSB315        | Source of <i>aphT</i> cassette                                                                                                      | (2)        |
| pKD4          | <i>oriRg</i> , <i>blaM</i> , <i>KanR</i> cassette flanked by FRT sites                                                              | (2)        |
| pKD46         | <i>ori101</i> , <i>repA 101</i> (ts), <i>araBp-gam-bet-exo</i> , <i>blaM</i>                                                        | (2)        |
| pRK5-myc      | Mammalian expression vector with N-term Myc tag                                                                                     | (3)        |
| pICC458       | pRK5-myc transfection vector expressing BI-1                                                                                        | This study |
| pRK5-myc-OspG | pRK5-myc transfection vector expressing <i>OspG</i>                                                                                 | (4)        |

- Schlosser-Silverman E, Elgrably-Weiss M, Rosenshine I, Kohen R, Altuvia S (2000) Characterization of *Escherichia coli* DNA lesions generated within J774 macrophages. *J Bacteriol* 182: 5225–5230.
- Datsenko KA, Wanner BL (2000) One-step inactivation of chromosomal genes in *Escherichia coli* K-12 using PCR products. *Proc Natl Acad Sci USA* 97:6640–6645.
- Berger CN, Crepin VF, Jepsen MA, Arbeloa A, Frankel G (2009) The mechanisms used by enteropathogenic *Escherichia coli* to control filopodia dynamics. *Cell Microbiol* 11:309–322.
- Kim DW, et al. (2005) The *Shigella flexneri* effector *OspG* interferes with innate immune responses by targeting ubiquitin-conjugating enzymes. *Proc Natl Acad Sci USA* 102: 14046–14051.

**Table S3. Primers used in this study**

|    | Sequence 5'–3'                                                         |
|----|------------------------------------------------------------------------|
| 1  | ATGCTATCACCATCTTCTGTAAATTTGGGGTGTTCATGGAATCTTTAACCACGTTGTGTCTCAAATCTC  |
| 2  | AATTTTACTTAATACCACTAATAAGATCTTGCTTTCTCCATGATAAGGAATCCCCGGATCCGTCGAC    |
| 3  | ATGTTATCGCCCTCTTCTATAAATTTGGGATGTTTCATGGAATCTTTAACGTGTAGGCTGGAGCTGCTTC |
| 4  | TATCTTACTTAATACTACACTAATAAGATCCAGCTTTCTCCGTGATAAGCATAGAATATCTCTTA      |
| 5  | CCGCGGGTGCACATGCTATCACCATCTTCTG                                        |
| 6  | AAAAGTGCAGTCATCAAATTTTACTTAATACCACTAAT                                 |
| 7  | CCGCGGGTGCACATGTTATCGCCCTCTTCTA                                        |
| 8  | AAAAGTGCAGTCATCATATCTTACTTAATACTACACTAAT                               |
| 9  | CGGGATCCTGCTATCACCATCTTCTG                                             |
| 10 | CCAATGCATTGGTTCTGCAGCTAAATTTTACTTAATACC                                |
| 11 | CGGGATCCTGTTATCGCCCTCTTCTA                                             |
| 12 | CCAATGCATTGGTTCTGCAGTTATATCTTACTTAATACT                                |
| 13 | CCCGGAAGCTTGATGCTATCACCATCTTCT                                         |
| 14 | ATAGTTAGCGGCCGAATTTTACTTAATACCACTAAT                                   |
| 15 | AAGGTCGGAGTCAACGGATTTGGT                                               |
| 16 | AGTGATGGCATGGACTGTGGTCAT                                               |
| 17 | CTATTCGATGATGAAGATACCCACCAAAACCAAAAAAAGAG                              |
| 18 | TTAGCATCTATGACTTTTTGGGGCGTTCAAGTG                                      |
| 19 | GTCATGGTGATGTTTGTTAAG                                                  |
| 20 | TACCAACTCCATCCATGCAAC                                                  |
| 21 | CAGGATCTTGCCATCCTATGGA                                                 |
| 22 | GCTTGATGGTCGGAAGAGCATA                                                 |
| 23 | GCAAATCCTGCGTGCTGACGG                                                  |
| 24 | CGGATCCTCATCCACATTGTAAGATCC                                            |
| 25 | TTATACGCAAGGCGACAAGG                                                   |
| 26 | GATCTCCGTCACAGGTAGG                                                    |
| 27 | AAAAGTGCAGTCATCATAACCACTAATAAGATCTTGCTT                                |
| 28 | AAAAGTGCAGTCATCATACTACACTAATAAGATCCAGCTT                               |
| 29 | GGAATTCATATGCTATCACCATCTTCTG                                           |
| 30 | GGATCCAGAACCCTAAATTTTACTTAATACC                                        |
| 31 | GAT GCA ACA AAA GTC CTG GCG ATG TTT ACT ACA TCT CAA AGC                |
| 32 | GCT TTG AGA TGT AGT AAA CAT CGC CAG GAC TTT TGT TGC ATC                |
| 33 | GCTGTTCAATCGAATAGACCTG                                                 |
| 34 | CAGGATCCCCGGGAATCCG                                                    |
| 35 | GCGAATTCAAAATTACCAGCACCATTATTCA                                        |
| 36 | CGGGATCCTCACAGATATTTGCGGTTGAGCA                                        |
| 37 | CCGGAATCCAACATATTTGATCGAAA                                             |
| 38 | CCCAAGCTTTCATTTCTTCTTTCTCTTA                                           |

**Table S4. Percentage of cells infected and with cleaved caspase-3 staining**

|                                              | Percent cells with cleaved caspase-3 |
|----------------------------------------------|--------------------------------------|
| Uninfected                                   | 0.33 ± 0.50                          |
| Wild type                                    | 1.18 ± 1.40                          |
| <i>ΔnleH1Δnleh2</i>                          | 43.00 ± 5.54                         |
| <i>ΔnleH1Δnleh2 p(nleh1)</i>                 | 23.78 ± 5.30                         |
| <i>ΔnleH1Δnleh2 p(nleh1<sub>K159A</sub>)</i> | 34.30 ± 8.81                         |
